# Supplementary material for: Life-space mobility assessment in older people in Finland; measurement properties in winter and spring
Source: PubMed Central journal article supplement (PMC4055210; doi:10.1186/1756-0500-7-323), 2014-05-30
Supplement: 1756-0500-7-323-S1.pdf [file 1756-0500-7-323-S1.pdf]

Additional file

**Additional file 1: Table S4. Two-week percentage of agreement and Intra-Class Correlation (ICC) for individual Life-Space Assessment items (N=39).**

|                                   | % of agreement | ICC    | 95% confidence interval |
|-----------------------------------|----------------|--------|-------------------------|
| Home – level <sup>†</sup>         | 100            | NA     | -                       |
| Home – frequency                  | 100            | NA     | -                       |
| Home – assistance <sup>†</sup>    | 95             | .64*** | (.18 - 1.0)             |
| Outside home – level <sup>†</sup> | 100            | 1***   | -                       |
| Outside home – frequency          | 79             | .80    | (.66 - .89)             |
| Outside home – assistance         | 97             | .97*** | (.95 - .99)             |
| Neighborhood – level <sup>†</sup> | 100            | 1***   | -                       |
| Neighborhood – frequency          | 54             | .67*** | (.45 - .81)             |
| Neighborhood – assistance         | 95             | .95*** | (.91 - .97)             |
| Town – level <sup>†</sup>         | 90             | .45**  | (.00 - .90)             |
| Town – frequency                  | 53             | .33*   | (.03 - .58)             |
| Town – assistance                 | 82             | .55*** | (.29 - .74)             |
| Beyond town – level <sup>†</sup>  | 69             | .36*   | (.07 - .66)             |
| Beyond town – frequency           | 67             | .62*** | (.38 - .78)             |
| Beyond town – assistance          | 69             | .38**  | (.07 - .62)             |

<sup>†</sup> Kappa and 95% confidence interval computed with  $Kappa \pm (1.96 * \text{standard deviation})$

\* <.05 \*\* <.01 \*\*\* <.001
